# Supplementary material for: Chemopreventive effects of ethanol extract of Psoralea Corylifolia and bakuchiol against human breast cancer cells
Source: Springer Nature journal article supplement (doi:10.1186/s12943-019-1082-3), 2007-01-01

**Figure S1**

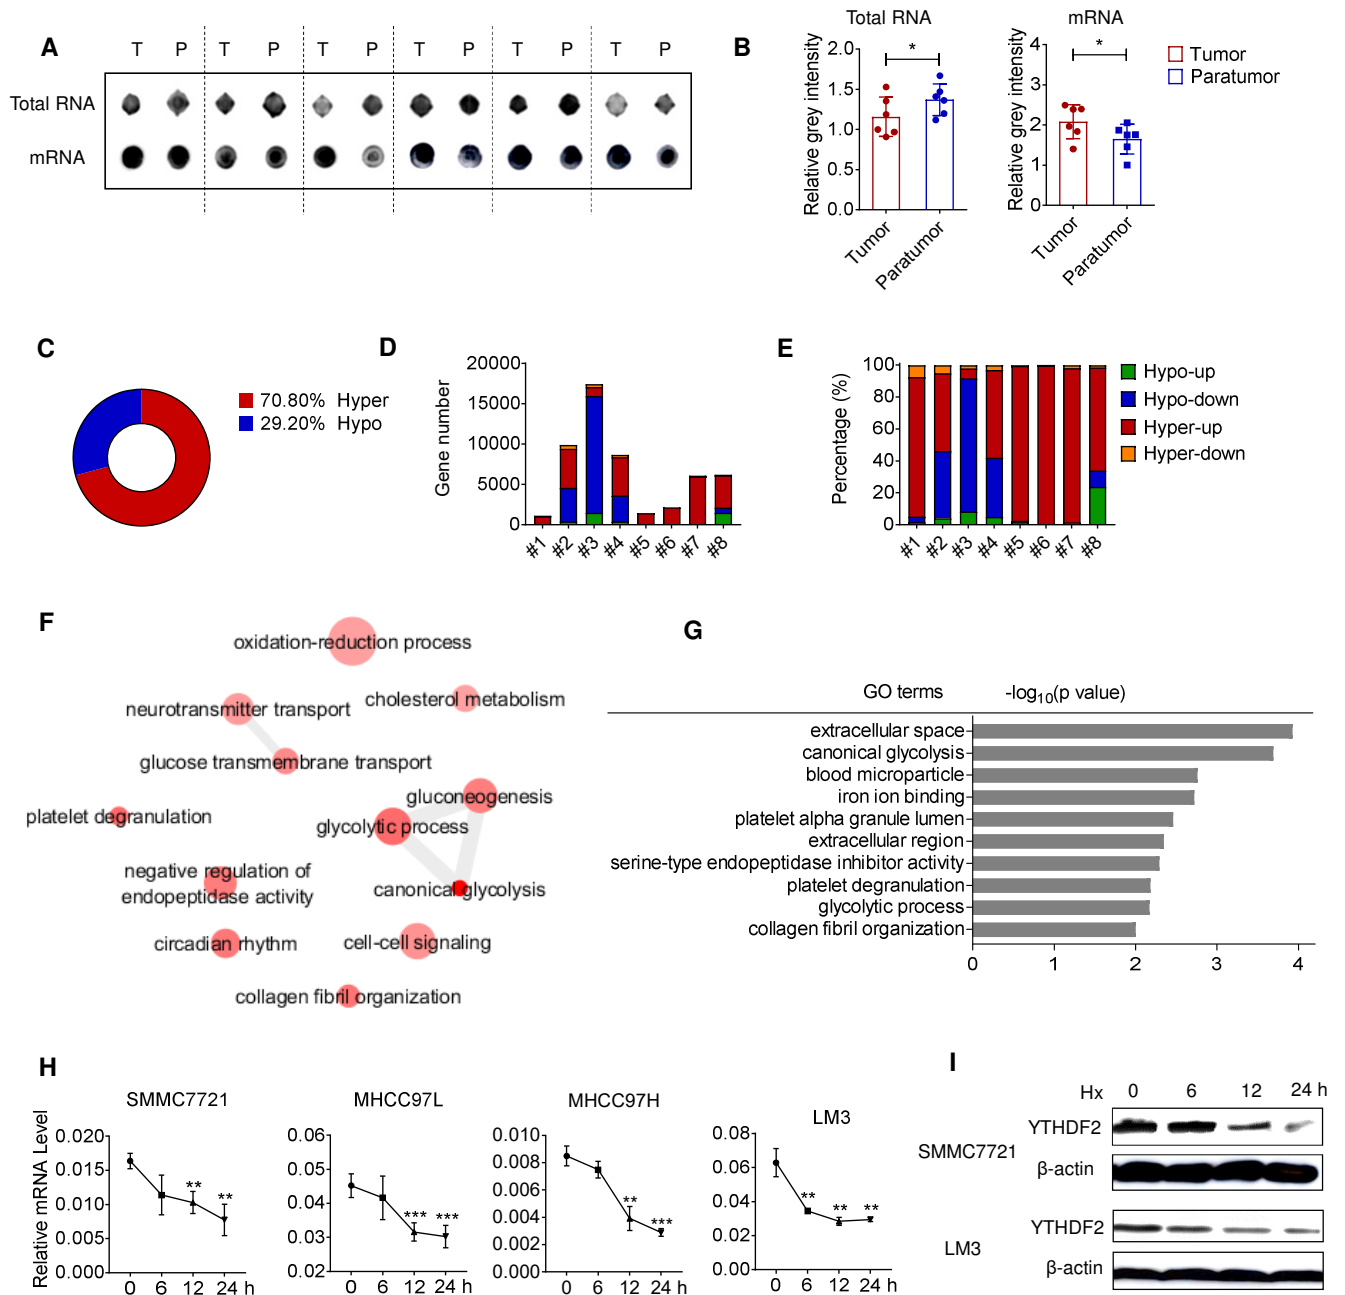

**Figure S2**

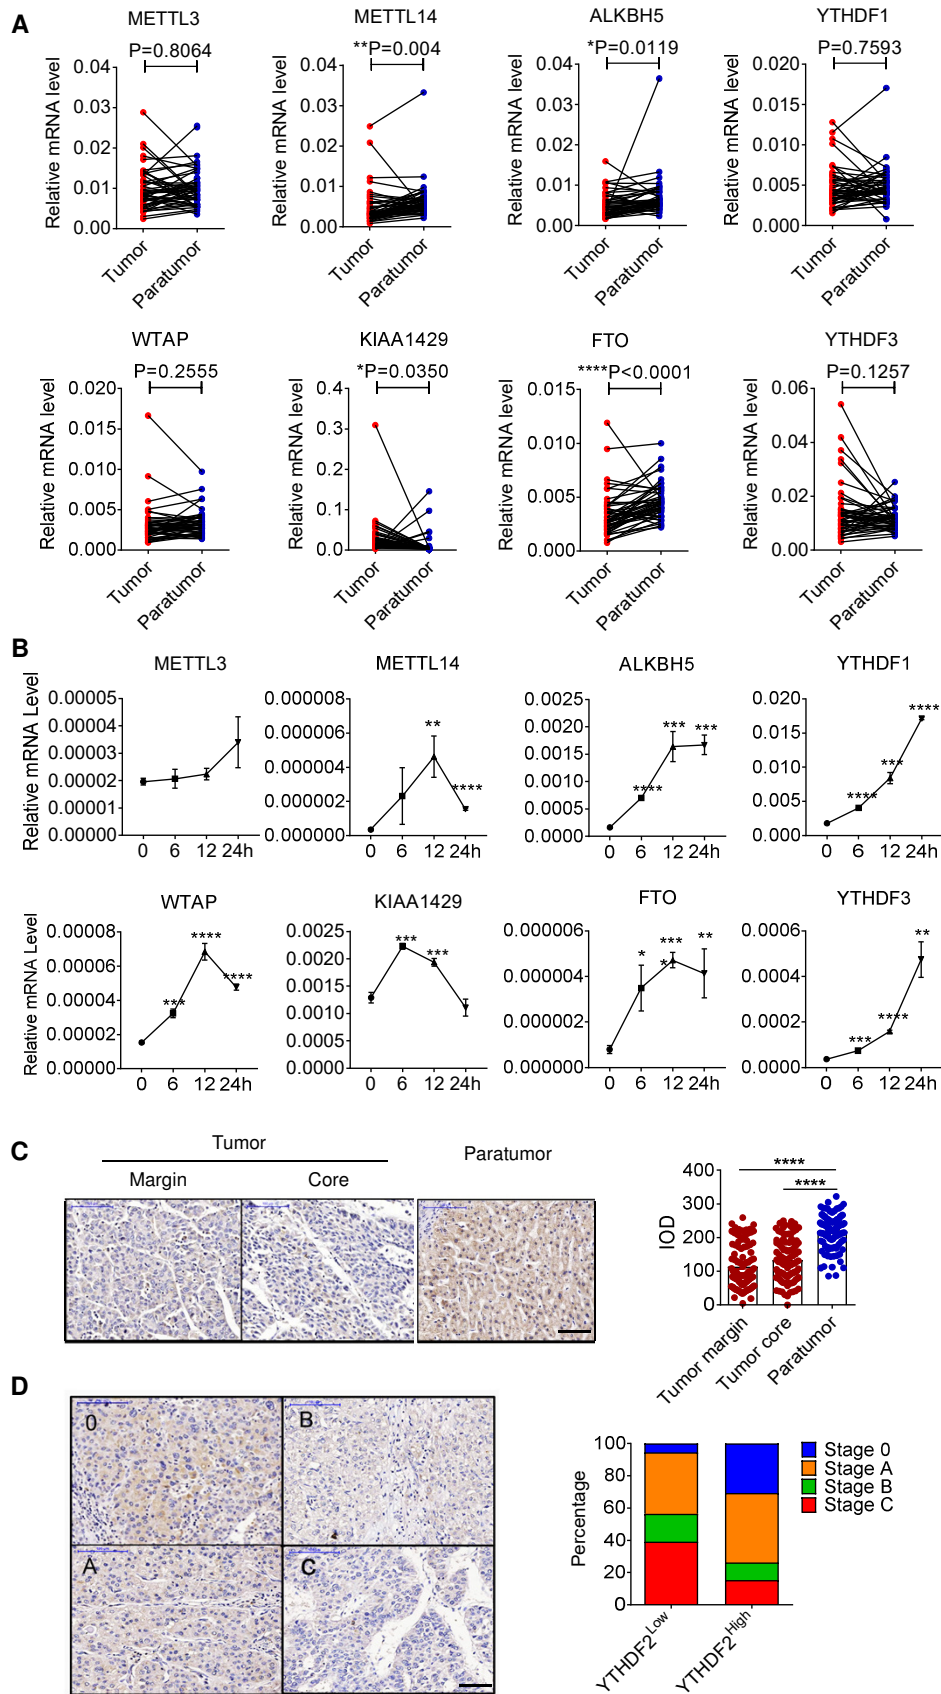

**Figure S3**

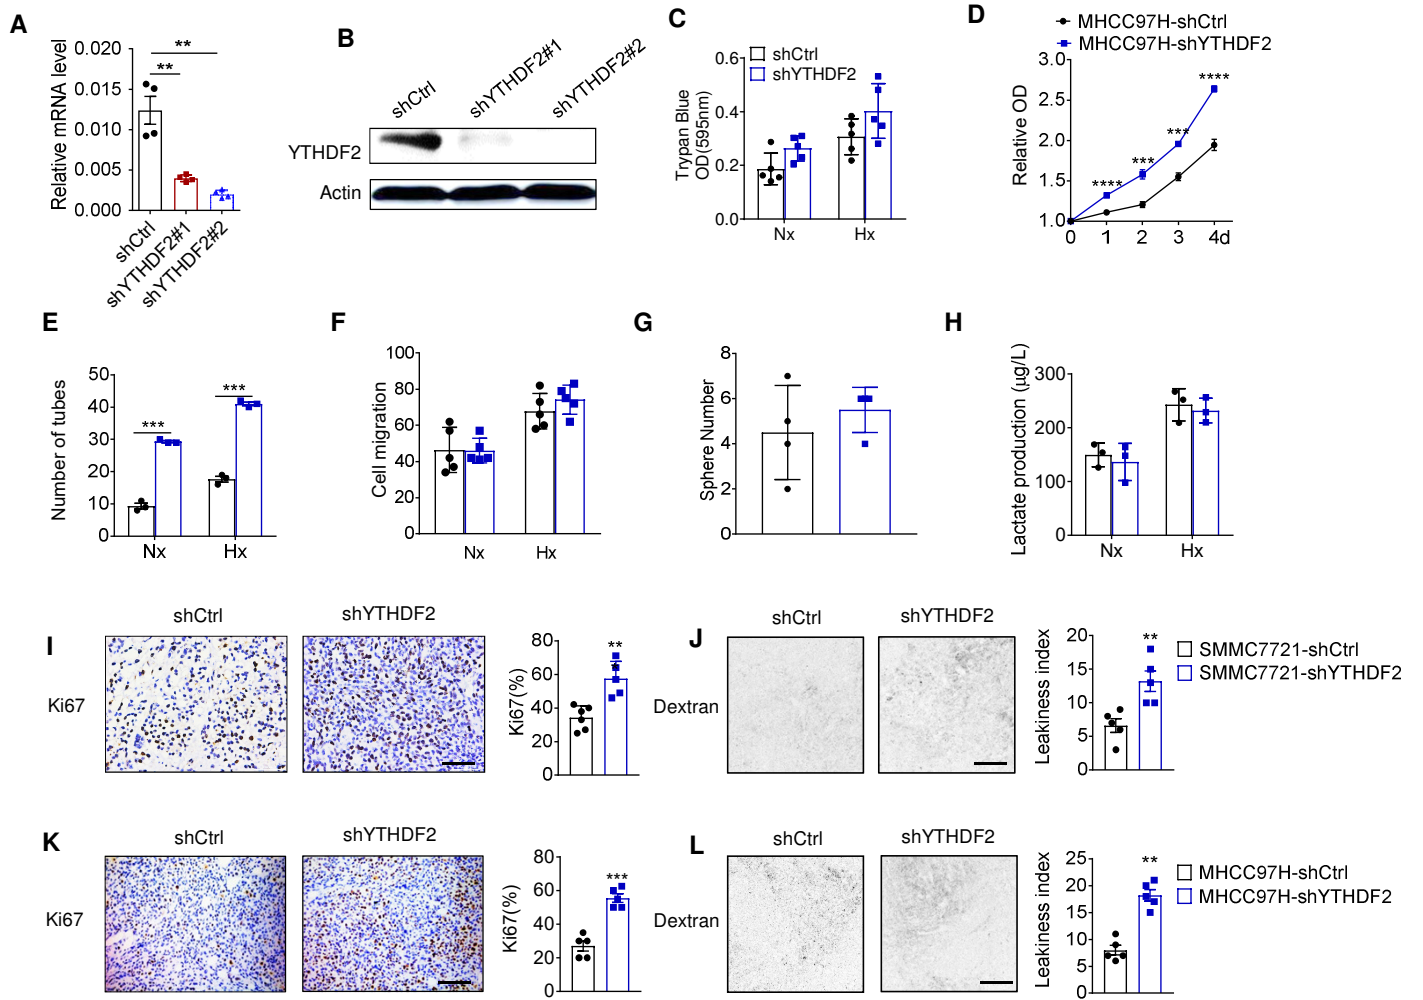

**Figure S4**

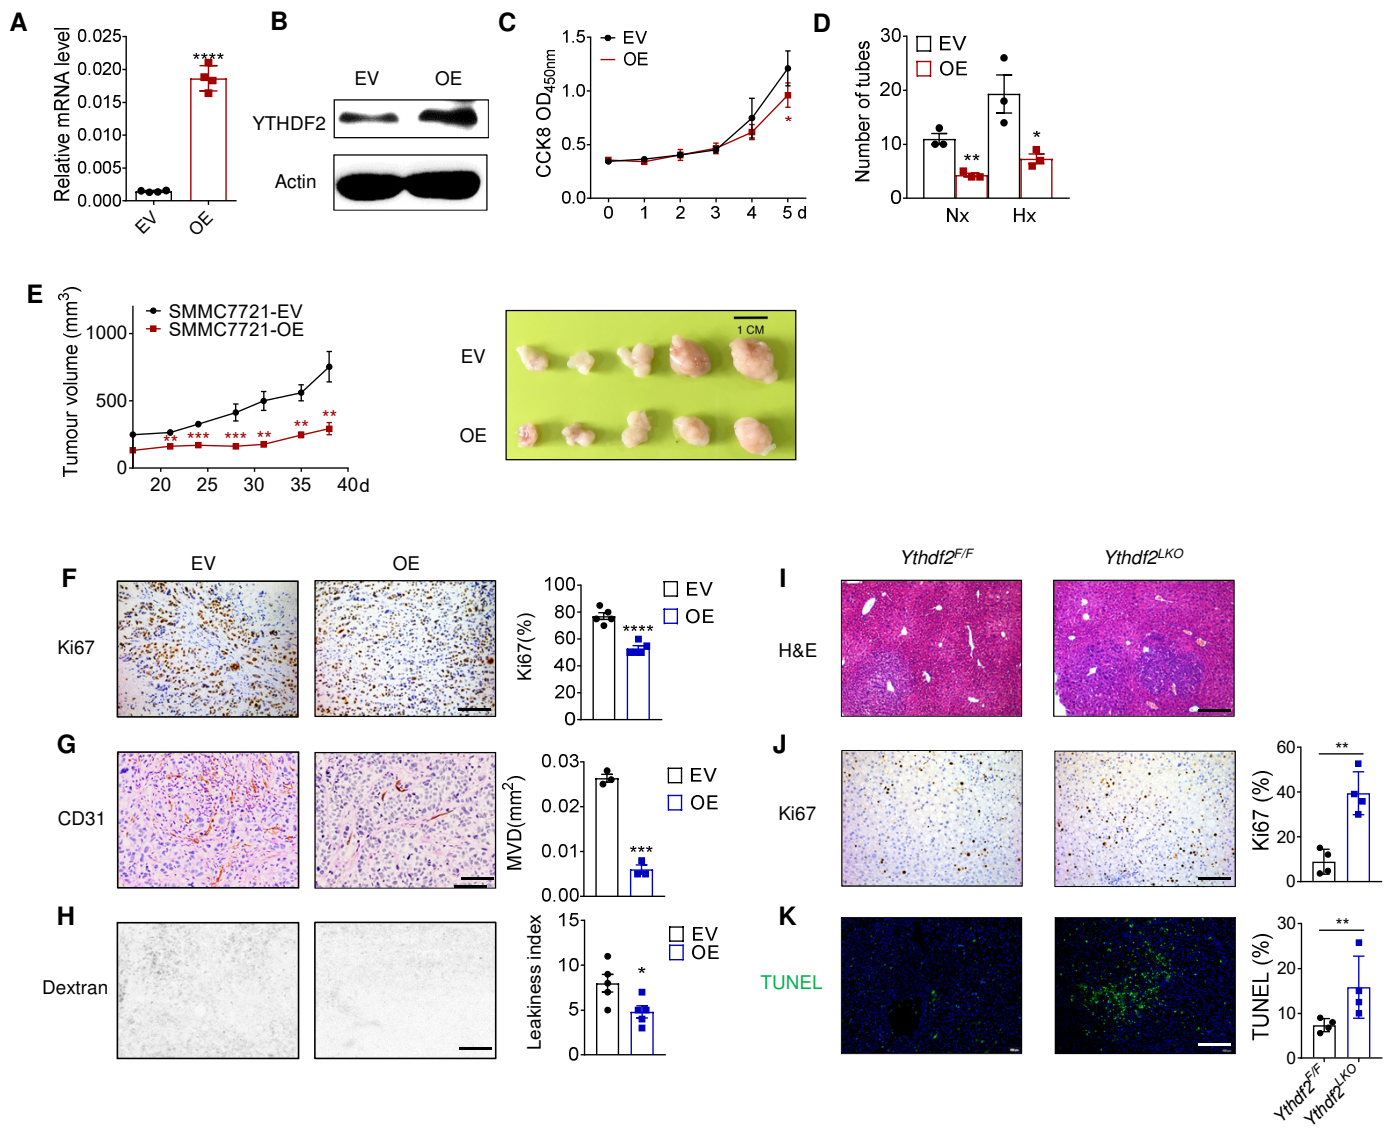

**Figure S5**

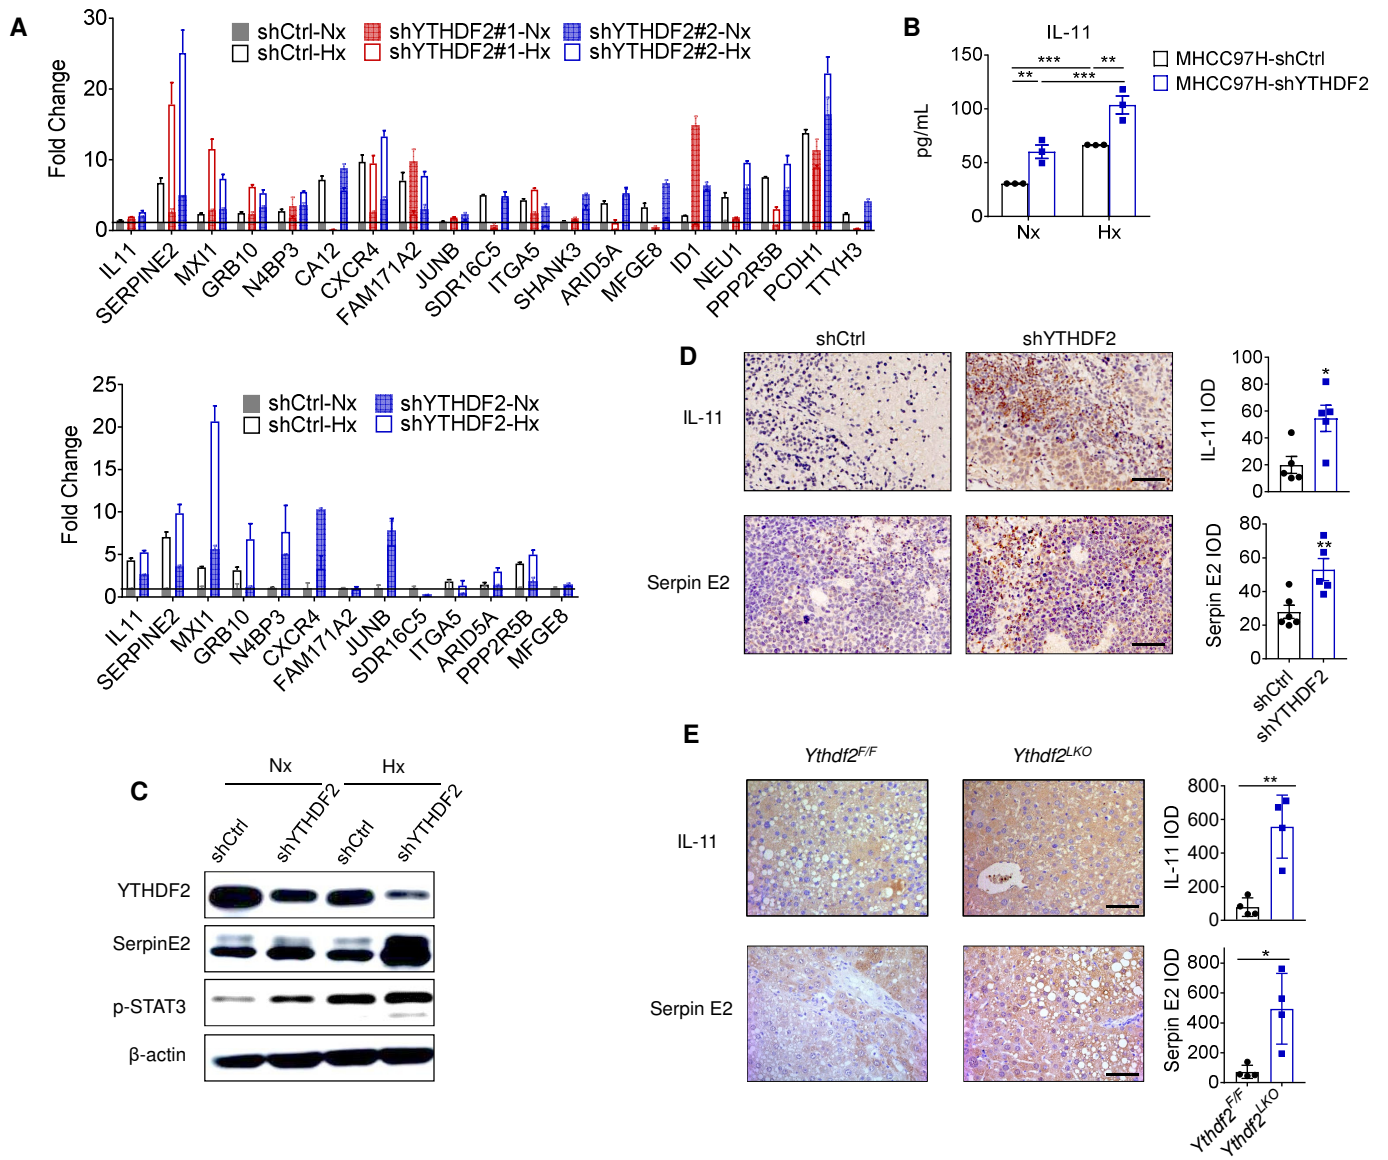

**Figure S6**

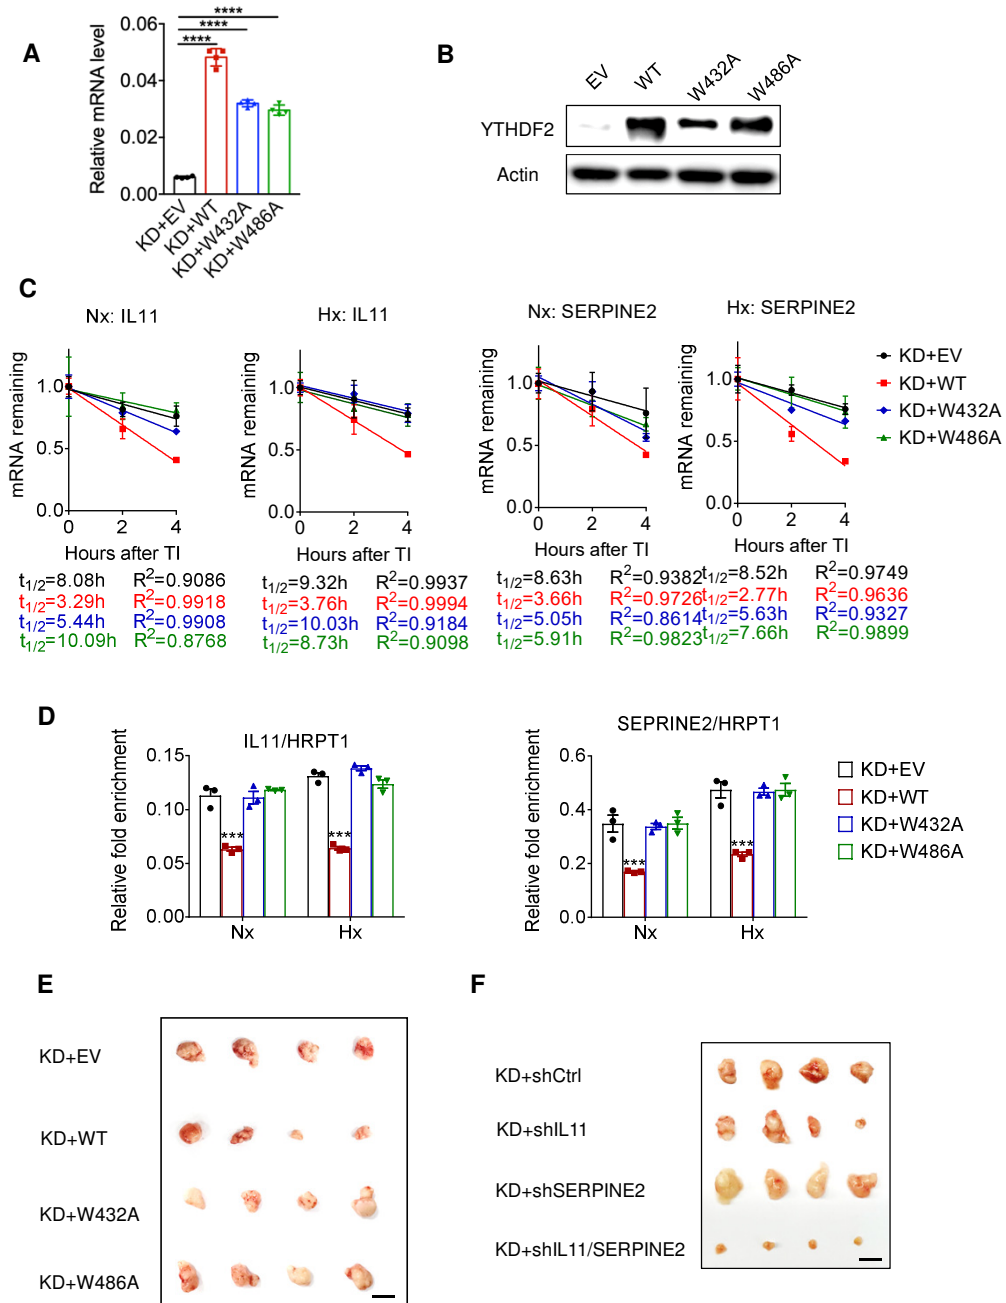

Figure S7

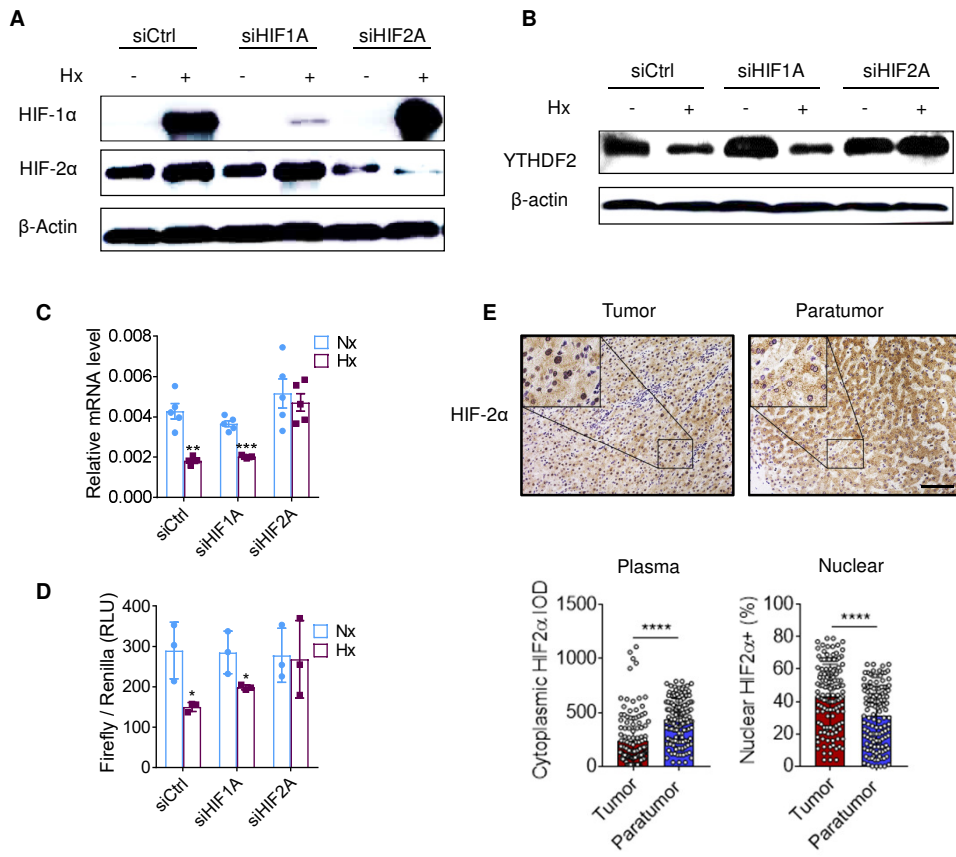

# Figure S8

Fig. 2D

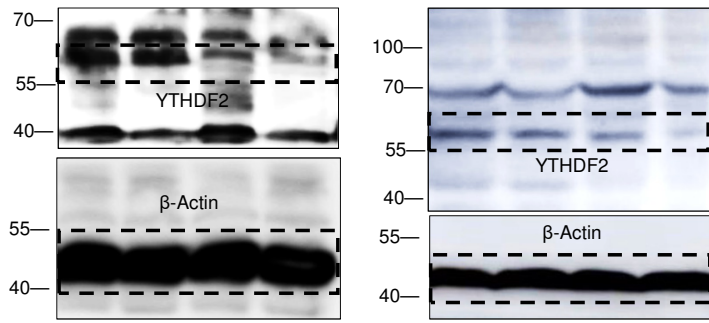

Fig. 2F

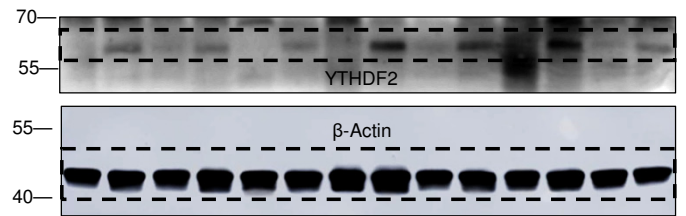

Fig. 3D

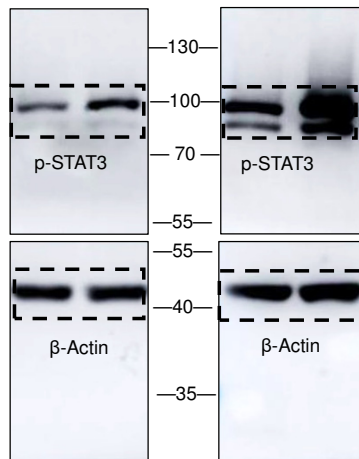

Fig. 3G

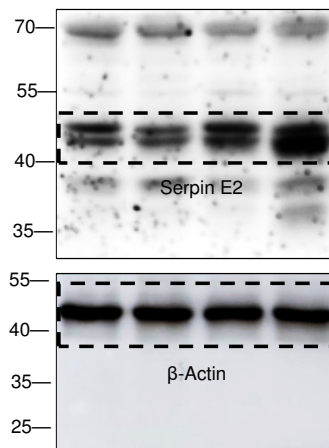

Fig. 3J

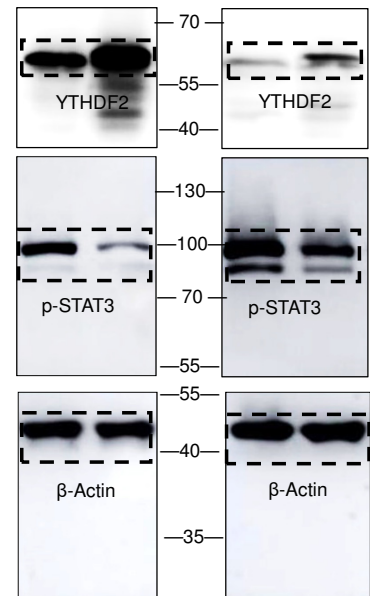

Fig. 5E

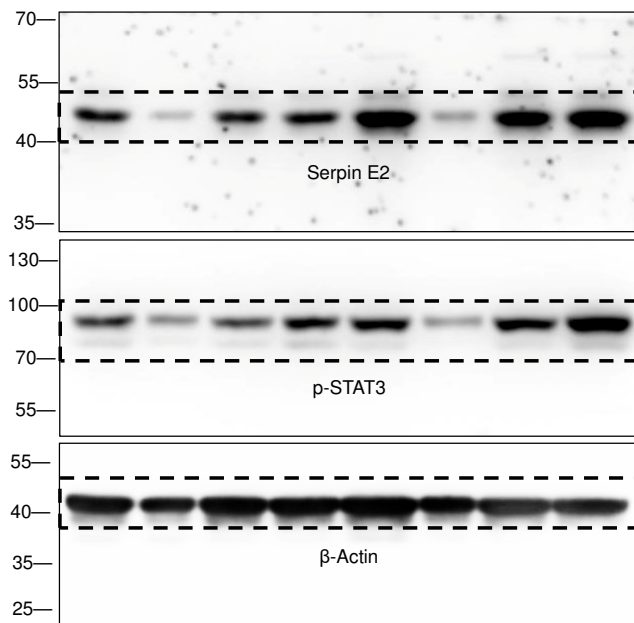

Fig. 6B

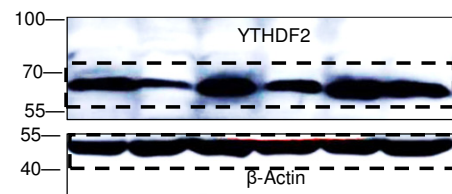

Fig. 6H

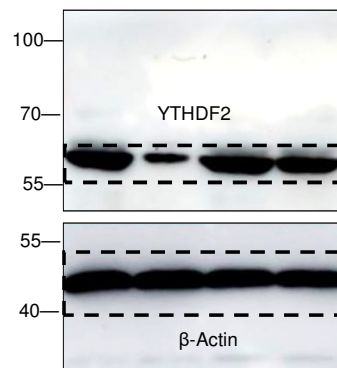



Fig. 6J

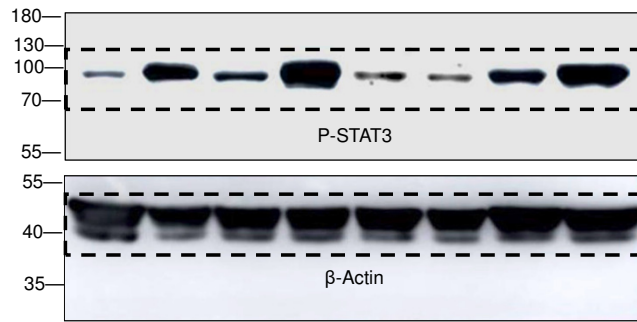

Supplementary Fig. 3B

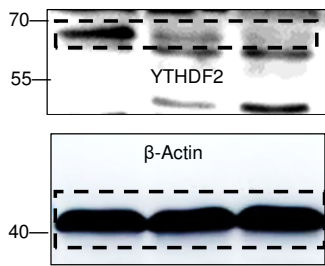

Supplementary Fig. 4B

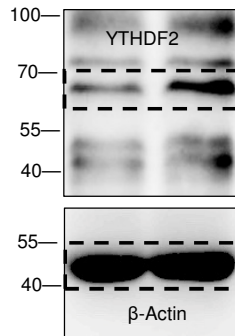

Supplementary Fig. 5C

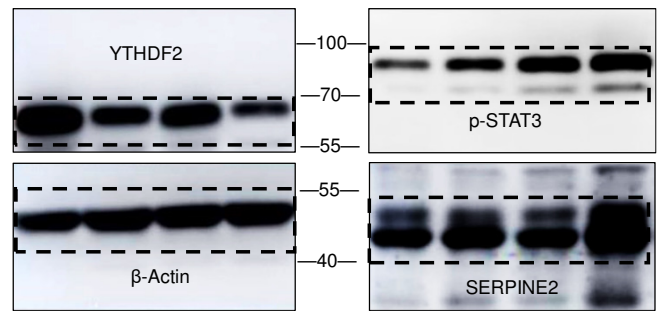

Supplementary Fig. 7A

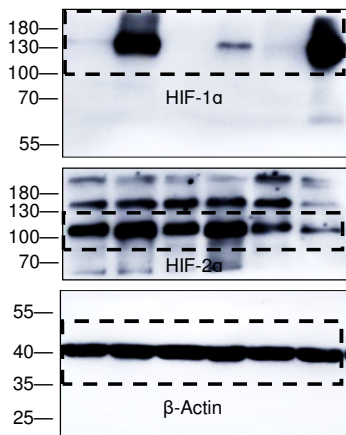

Supplementary Fig. 7B

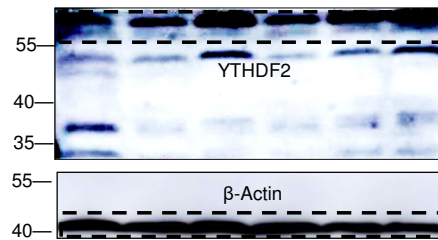

Supplement: MOESM1 [file 17401696]
